# Supplementary material
Source: publisher site journal article supplement (https://www.dovepress.com/article/supplementary_file/600914/600914%20-%20Revised%20Supplementary%20Table%20S1.docx)
Supplement: Supplementary file 1 [file 600914%20-%20Revised%20Supplementary%20Table%20S1.docx]

**Supplementary Table S1. Comparison of baseline characteristics between included and excluded participants.**

| **Characteristic** | **Included (n = 191)** | **Excluded (n = 166)** | **P value** |
| --- | --- | --- | --- |
| Sex, male/female, n (%) | 101/90 (52.9/47.1) | 82/84 (49.4/50.6) | 0.512 |
| Age, years | 11.90 (11.10, 12.80) | 11.90 (10.70, 13.30) | 0.821 |
| BMI, kg/m² | 29.07 (26.10, 32.65) | 27.37 (25.80, 31.02) | 0.122 |

Note: Data are presented as median (Q1, Q3) for continuous variables and as n (%) for categorical variables. P values were calculated using the Mann–Whitney U test for continuous variables and the Pearson chi-square test for sex. Excluded participants comprised the 166 children removed for incomplete core study data (predominantly missing body-composition or pulmonary-function measurements). No significant differences were observed between groups (all P > 0.05). BMI, body mass index.
